# Supplementary material for: A Global Analysis of Diet and Nutrient Inadequacies across Ages in a Population-Based Study of Brazilian Adults
Source: Preprints.org preprint supplement (doi:10.20944/preprints202402.0671.v1), 2024-02-12
Supplement: Supplementary file 1 [file supplementary]

**S1 Table:** Macronutrient intake in adults in the urban areas of Brazil, 2015.

|                                                    | Carbohydrates | Proteins     | Total fats   |
|----------------------------------------------------|---------------|--------------|--------------|
| AMDR                                               | 45-65%        | 10-35%       | 20-35%       |
|                                                    | n (%)         | n (%)        | n (%)        |
| <b>Total population (n = 1812)</b>                 |               |              |              |
| Below AMDR                                         | 247 (13.6%)   | 6 (0.3%)     | 30 (1.7%)    |
| Within AMDR                                        | 1535 (84.7%)  | 1806 (99.7%) | 1463 (80.7%) |
| Above AMDR                                         | 30 (1.7%)     | 0 (0.00%)    | 319 (17.6%)  |
| <b>Male (n = 828)</b>                              |               |              |              |
| Below AMDR                                         | 121 (14.6%)   | 3 (0.4%)     | 19 (2.3%)    |
| Within AMDR                                        | 697 (84.2%)   | 825 (99.6%)  | 675 (81.5%)  |
| Above AMDR                                         | 10 (1.2%)     | 0 (0.00%)    | 134 (16.2%)  |
| <b>Female (n = 984)</b>                            |               |              |              |
| Below AMDR                                         | 126 (12.8%)   | 3 (0.3%)     | 11 (1.1%)    |
| Within AMDR                                        | 838 (85.2%)   | 981 (99.7%)  | 788 (80.1%)  |
| Above AMDR                                         | 20 (2.0%)     | 0 (0.00%)    | 185 (18.8%)  |
| Acceptable macronutrient distribution range (AMDR) |               |              |              |
