# Supplementary material for: A Global Analysis of Diet and Nutrient Inadequacies across Ages in a Population-Based Study of Brazilian Adults
Source: Preprints.org preprint supplement (doi:10.20944/preprints202402.0671.v1), 2024-02-12
Supplement: Supplementary file 2 [file supplementary]

**S2 Table:** Top 10 food sources contributing to nutrient total intake in adults in the urban areas of Brazil, 2015.

|        |                                                                              | PROTEIN                          |                         |       |       |
|--------|------------------------------------------------------------------------------|----------------------------------|-------------------------|-------|-------|
| FoodID | Food name (category)                                                         | Contribution to total intake (%) | Frequency of intake (n) | Mean  | SD    |
| 6510   | beef, steak - beef, sirloin, visible fat eaten                               | 11.92                            | 479                     | 132.1 | 85.1  |
| 6256   | poultry, chicken, breast, skin removed before cooking                        | 7.38                             | 346                     | 97.9  | 78.5  |
| 8741   | bread, loaf, French bread                                                    | 7.34                             | 1331                    | 66.6  | 32.6  |
| 6356   | beef, cubes or stew meat, tip or kabobs, visible fat eaten                   | 6.15                             | 299                     | 95.1  | 70.9  |
| 11009  | vegetables, beans, brown, canned - drained, regular                          | 5.45                             | 1426                    | 55.7  | 41.2  |
| 9097   | fish and seafood, cod, cooked from fresh or frozen, Atlantic                 | 5.06                             | 152                     | 206.7 | 138.4 |
| 4338   | milk, whole (3.5 - 4% fat)                                                   | 3.63                             | 1142                    | 143.0 | 117.4 |
| 18389  | beef, hamburger or ground beef, 10% fat (90% lean meat)                      | 3.61                             | 292                     | 66.0  | 67.0  |
| 8558   | grains, rice, white, regular cooking, cooked in salted water                 | 3.55                             | 1820                    | 102.9 | 67.3  |
| 6271   | poultry, chicken, thigh, skin eaten                                          | 3.19                             | 231                     | 69.5  | 55.3  |
|        |                                                                              | OMEGA 3                          |                         |       |       |
| FoodID | Food name (category)                                                         | Contribution to total intake (%) | Frequency of intake (n) | Mean  | SD    |
| 9097   | fish and seafood, cod, cooked from fresh or frozen, Atlantic                 | 41.03                            | 152                     | 206.7 | 138.4 |
| 114107 | fish and seafood, salmon, cooked from fresh or frozen, coho (silver), farmed | 10.34                            | 7                       | 200.0 | 28.9  |
| 6271   | poultry, chicken, thigh, skin eaten                                          | 9.52                             | 231                     | 69.5  | 55.3  |
| 6256   | poultry, chicken, breast, skin removed before cooking                        | 8.64                             | 346                     | 97.9  | 78.5  |
| 1798   | ingredient, egg, whole                                                       | 7.10                             | 499                     | 44.0  | 43.0  |
| 9459   | fish and seafood, sardines, canned in oil, drained                           | 5.69                             | 19                      | 69.4  | 51.4  |
| 9462   | fish and seafood, sardines, cooked from fresh or frozen                      | 4.98                             | 7                       | 69.9  | 43.9  |
| 6255   | poultry, chicken, breast, skin eaten                                         | 1.36                             | 79                      | 101.4 | 77.9  |
| 9162   | fish and seafood, hake, cooked from fresh or frozen, silver                  | 0.89                             | 1                       | 120.0 | .     |
| 975    | eggs, boiled                                                                 | 0.82                             | 87                      | 29.6  | 27.6  |
|        |                                                                              | IRON                             |                         |       |       |
| FoodID | Food name (category)                                                         | Contribution to total intake (%) | Frequency of intake (n) | Mean  | SD    |
| 11009  | vegetables, beans, brown, canned - drained, regular                          | 20.02                            | 1426                    | 55.7  | 41.2  |
| 8741   | bread, loaf, French bread                                                    | 18.03                            | 1331                    | 66.6  | 32.6  |
| 6510   | beef, steak - beef, sirloin, visible fat eaten                               | 5.21                             | 479                     | 132.1 | 85.1  |
| 11014  | vegetables, beans, black, canned - drained, regular                          | 3.12                             | 218                     | 49.2  | 26.1  |
| 8531   | grains, pasta or noodles, spaghetti noodles, white, cooked in salted water   | 3.11                             | 343                     | 124.6 | 95.0  |
| 1821   | ingredient, flour, white all-purpose, enriched                               | 2.86                             | 616                     | 22.8  | 26.1  |
| 18389  | beef, hamburger or ground beef, 10% fat (90% lean meat)                      | 2.80                             | 292                     | 66.0  | 67.0  |
| 6356   | beef, cubes or stew meat, tip or kabobs, visible fat eaten                   | 2.34                             | 299                     | 95.1  | 70.9  |
| 27320  | crackers, wheat, reduced fat                                                 | 1.89                             | 257                     | 36.1  | 31.8  |
| 6395   | beef, organ meats, liver                                                     | 1.81                             | 35                      | 184.3 | 92.7  |
|        |                                                                              | VITAMIN D                        |                         |       |       |
| FoodID | Food name (category)                                                         | Contribution to total intake (%) | Frequency of intake (n) | Mean  | SD    |
| 4338   | milk, whole (3.5 - 4% fat)                                                   | 33.96                            | 1142                    | 143.0 | 117.4 |
| 1798   | ingredient, egg, whole                                                       | 7.79                             | 499                     | 44.0  | 43.0  |
| 6510   | beef, steak - beef, sirloin, visible fat eaten                               | 7.22                             | 479                     | 132.1 | 85.1  |
| 9097   | fish and seafood, cod, cooked from fresh or frozen, Atlantic                 | 5.89                             | 152                     | 206.7 | 138.4 |
| 4350   | milk, unprepared dry powder, whole                                           | 5.40                             | 206                     | 15.3  | 13.6  |
| 114107 | fish and seafood, salmon, cooked from fresh or frozen, coho (silver), farmed | 3.69                             | 7                       | 200.0 | 28.9  |

|       |                                                                                                          |
|-------|----------------------------------------------------------------------------------------------------------|
| 25488 | milk, mixtures and milk drinks, cocoa or hot chocolate, dry mix - unprepared, regular, chocolate flavors |
| 4783  | yogurt, plain, whole milk (3-4% fat)                                                                     |
| 3203  | cheese, American cheese, process                                                                         |
| 4787  | yogurt, fruited, regular, whole milk (3-4% fat)                                                          |

|      |     |       |       |
|------|-----|-------|-------|
| 3.09 | 159 | 21.6  | 11.7  |
| 2.75 | 39  | 216.3 | 129.4 |
| 2.19 | 44  | 40.6  | 44.5  |
| 2.01 | 35  | 175.9 | 73.1  |

**FoodID Food name (category)**

|       |                                                                      |
|-------|----------------------------------------------------------------------|
| 11009 | vegetables, beans, brown, canned - drained, regular                  |
| 8558  | grains, rice, white, regular cooking, cooked in salted water         |
| 8741  | bread, loaf, French bread                                            |
| 11014 | vegetables, beans, black, canned - drained, regular                  |
| 7581  | vegetables, potato, boiled, without skin                             |
| 8485  | grains, pasta or noodles, egg noodles, white, cooked in salted water |
| 3159  | vegetables, tomato, raw                                              |
| 4974  | fruit, banana, fresh or ripe                                         |
| 11137 | fruit, guava (guayaba), fresh common                                 |
| 5217  | fruit, orange, fresh                                                 |

**TOTAL FIBER**

| Contribution to total intake (%) | Frequency of intake (n) | Mean  | SD    |
|----------------------------------|-------------------------|-------|-------|
| 39.33                            | 1426                    | 55.7  | 41.2  |
| 8.73                             | 1820                    | 102.9 | 67.3  |
| 6.19                             | 1331                    | 66.6  | 32.6  |
| 5.25                             | 218                     | 49.2  | 26.1  |
| 2.29                             | 456                     | 117.5 | 137.9 |
| 2.08                             | 86                      | 148.0 | 96.9  |
| 1.78                             | 590                     | 86.5  | 169.1 |
| 1.77                             | 423                     | 71.8  | 50.6  |
| 1.56                             | 68                      | 140.5 | 119.1 |
| 1.30                             | 148                     | 167.5 | 135.0 |

**FoodID Food name (category)**

|       |                                                         |
|-------|---------------------------------------------------------|
| 4338  | milk, whole (3.5 - 4% fat)                              |
| 3264  | cheese, Mozzarella cheese, whole milk                   |
| 11009 | vegetables, beans, brown, canned - drained, regular     |
| 4350  | milk, unprepared dry powder, whole                      |
| 4864  | cheese, American cheese, process - reduced fat          |
| 3265  | cheese, Mozzarella cheese, part skim milk, regular      |
| 10784 | ingredient, cornmeal - dry, yellow (degermed, enriched) |
| 8741  | bread, loaf, French bread                               |
| 4341  | milk, skim, nonfat or fat free                          |
| 149   | beverages, beer, regular                                |

**CALCIUM**

| Contribution to total intake (%) | Frequency of intake (n) | Mean   | SD     |
|----------------------------------|-------------------------|--------|--------|
| 24.57                            | 1142                    | 143.0  | 117.4  |
| 11.40                            | 339                     | 31.4   | 28.2   |
| 5.25                             | 1426                    | 55.7   | 41.2   |
| 3.43                             | 206                     | 15.3   | 13.6   |
| 2.83                             | 76                      | 52.5   | 38.7   |
| 2.44                             | 80                      | 26.5   | 27.9   |
| 1.86                             | 123                     | 56.5   | 56.5   |
| 1.73                             | 1331                    | 66.6   | 32.6   |
| 1.70                             | 65                      | 175.4  | 169.8  |
| 1.67                             | 206                     | 1655.7 | 1599.0 |

**FoodID Food name (category)**

|       |                                                                                                          |
|-------|----------------------------------------------------------------------------------------------------------|
| 6395  | beef, organ meats, liver                                                                                 |
| 10719 | fats, margarine, regular, tub, salted, soybean oil                                                       |
| 4338  | milk, whole (3.5 - 4% fat)                                                                               |
| 7647  | vegetables, sweet potato, boiled                                                                         |
| 1058  | fats, butter, regular, salted                                                                            |
| 25488 | milk, mixtures and milk drinks, cocoa or hot chocolate, dry mix - unprepared, regular, chocolate flavors |
| 2964  | vegetables, carrots, cooked from fresh                                                                   |
| 4864  | cheese, American cheese, process - reduced fat                                                           |
| 1798  | ingredient, egg, whole                                                                                   |
| 13930 | vegetables, lettuce, green leaf                                                                          |

**VITAMIN A**

| Contribution to total intake (%) | Frequency of intake (n) | Mean  | SD    |
|----------------------------------|-------------------------|-------|-------|
| 56.89                            | 35                      | 184.3 | 92.7  |
| 6.54                             | 1007                    | 14.7  | 17.6  |
| 4.51                             | 1142                    | 143.0 | 117.4 |
| 3.06                             | 22                      | 291.6 | 237.2 |
| 2.93                             | 333                     | 15.5  | 14.8  |
| 1.66                             | 159                     | 21.6  | 11.7  |
| 1.63                             | 212                     | 39.6  | 36.7  |
| 1.52                             | 76                      | 52.5  | 38.7  |
| 1.52                             | 499                     | 44.0  | 43.0  |
| 1.51                             | 476                     | 34.9  | 25.8  |

**VITAMIN C**

**FoodID Food name (category)**

|        |                                                                                                          |
|--------|----------------------------------------------------------------------------------------------------------|
| 8064   | beverages, juice or flavored drink, orange, juice, fresh                                                 |
| 107891 | beverages, juice or flavored drink, acerola juice                                                        |
| 5217   | fruit, orange, fresh                                                                                     |
| 3159   | vegetables, tomato, raw                                                                                  |
| 21192  | beverages, juice or flavored drink, dry mix - unprepared, fruit flavored drink, presweetened, with sugar |

| Contribution to total intake (%) | Frequency of intake (n) | Mean  | SD    |
|----------------------------------|-------------------------|-------|-------|
| 18.97                            | 150                     | 284.0 | 143.0 |
| 9.42                             | 46                      | 106.3 | 63.3  |
| 8.01                             | 148                     | 167.5 | 135.0 |
| 6.57                             | 590                     | 86.5  | 169.1 |
| 5.95                             | 451                     | 16.0  | 32.6  |

|                  |                                                                                            |                                         |                                |             |           |
|------------------|--------------------------------------------------------------------------------------------|-----------------------------------------|--------------------------------|-------------|-----------|
| 7942             | beverages, juice or flavored drink, black currant juice                                    | 5.64                                    | 15                             | 331.1       | 82.1      |
| 5221             | fruit, papaya, fresh                                                                       | 5.36                                    | 82                             | 130.8       | 98.4      |
| 11137            | fruit, guava (guayaba), fresh common                                                       | 4.68                                    | 68                             | 140.5       | 119.1     |
| 8066             | beverages, juice or flavored drink, orange, juice, purchased ready-to-drink, not fortified | 3.02                                    | 207                            | 71.6        | 145.2     |
| 5182             | fruit, mango, fresh                                                                        | 3.02                                    | 135                            | 121.7       | 93.5      |
| <b>VITAMIN E</b> |                                                                                            |                                         |                                |             |           |
| <b>FoodID</b>    | <b>Food name (category)</b>                                                                | <b>Contribution to total intake (%)</b> | <b>Frequency of intake (n)</b> | <b>Mean</b> | <b>SD</b> |
| 1177             | fats, oil, soybean - unhydrogenated                                                        | 18.15                                   | 6215                           | 3.1         | 4.1       |
| 10719            | fats, margarine, regular, tub, salted, soybean oil                                         | 11.26                                   | 1007                           | 14.7        | 17.6      |
| 11009            | vegetables, beans, brown, canned - drained, regular                                        | 9.53                                    | 1426                           | 55.7        | 41.2      |
| 11709            | fruit, passion fruit (maracuya) - fresh                                                    | 4.47                                    | 77                             | 37.9        | 17.6      |
| 9097             | fish and seafood, cod, cooked from fresh or frozen, Atlantic                               | 3.84                                    | 152                            | 206.7       | 138.4     |
| 107857           | beverages, tea, Yerba Mate                                                                 | 3.66                                    | 37                             | 576.6       | 541.9     |
| 1169             | fats, oil, olive                                                                           | 3.39                                    | 541                            | 4.4         | 5.4       |
| 6510             | beef, steak - beef, sirloin, visible fat eaten                                             | 2.19                                    | 479                            | 132.1       | 85.1      |
| 3159             | vegetables, tomato, raw                                                                    | 2.18                                    | 590                            | 86.5        | 169.1     |
| 6381             | beef, jerky, regular                                                                       | 2.15                                    | 83                             | 78.1        | 75.5      |
| <b>MAGNESIUM</b> |                                                                                            |                                         |                                |             |           |
| <b>FoodID</b>    | <b>Food name (category)</b>                                                                | <b>Contribution to total intake (%)</b> | <b>Frequency of intake (n)</b> | <b>Mean</b> | <b>SD</b> |
| 11009            | vegetables, beans, brown, canned - drained, regular                                        | 17.61                                   | 1426                           | 55.7        | 41.2      |
| 7772             | beverages, coffee, regular (caffeinated), made from ground                                 | 6.80                                    | 1894                           | 136.1       | 84.6      |
| 149              | beverages, beer, regular                                                                   | 6.30                                    | 206                            | 1655.7      | 1599.0    |
| 8741             | bread, loaf, French bread                                                                  | 5.84                                    | 1331                           | 66.6        | 32.6      |
| 4338             | milk, whole (3.5 - 4% fat)                                                                 | 4.31                                    | 1142                           | 143.0       | 117.4     |
| 4974             | fruit, banana, fresh or ripe                                                               | 3.05                                    | 423                            | 71.8        | 50.6      |
| 8558             | grains, rice, white, regular cooking, cooked in salted water                               | 2.97                                    | 1820                           | 102.9       | 67.3      |
| 6510             | beef, steak - beef, sirloin, visible fat eaten                                             | 2.34                                    | 479                            | 132.1       | 85.1      |
| 11014            | vegetables, beans, black, canned - drained, regular                                        | 2.26                                    | 218                            | 49.2        | 26.1      |
| 8531             | grains, pasta or noodles, spaghetti noodles, white, cooked in salted water                 | 2.03                                    | 343                            | 124.6       | 95.0      |
