# Supplementary material for: A Global Analysis of Diet and Nutrient Inadequacies across Ages in a Population-Based Study of Brazilian Adults
Source: Preprints.org preprint supplement (doi:10.20944/preprints202402.0671.v1), 2024-02-12
Supplement: Supplementary file 3 [file supplementary]

Archive with 2 entries (2 files):
- S1 Table.pdf
- S2 Table.pdf
